# Supplementary material for: Comparative analysis indicates regulatory neofunctionalization of yeast duplicates
Source: PubMed Central journal article supplement (PMC1895995; doi:10.1186/gb-2007-8-4-r50), 2007-04-05
Supplement: gb-2007-8-4-r50-S3.pdf [file gb-2007-8-4-r50-S3.pdf]

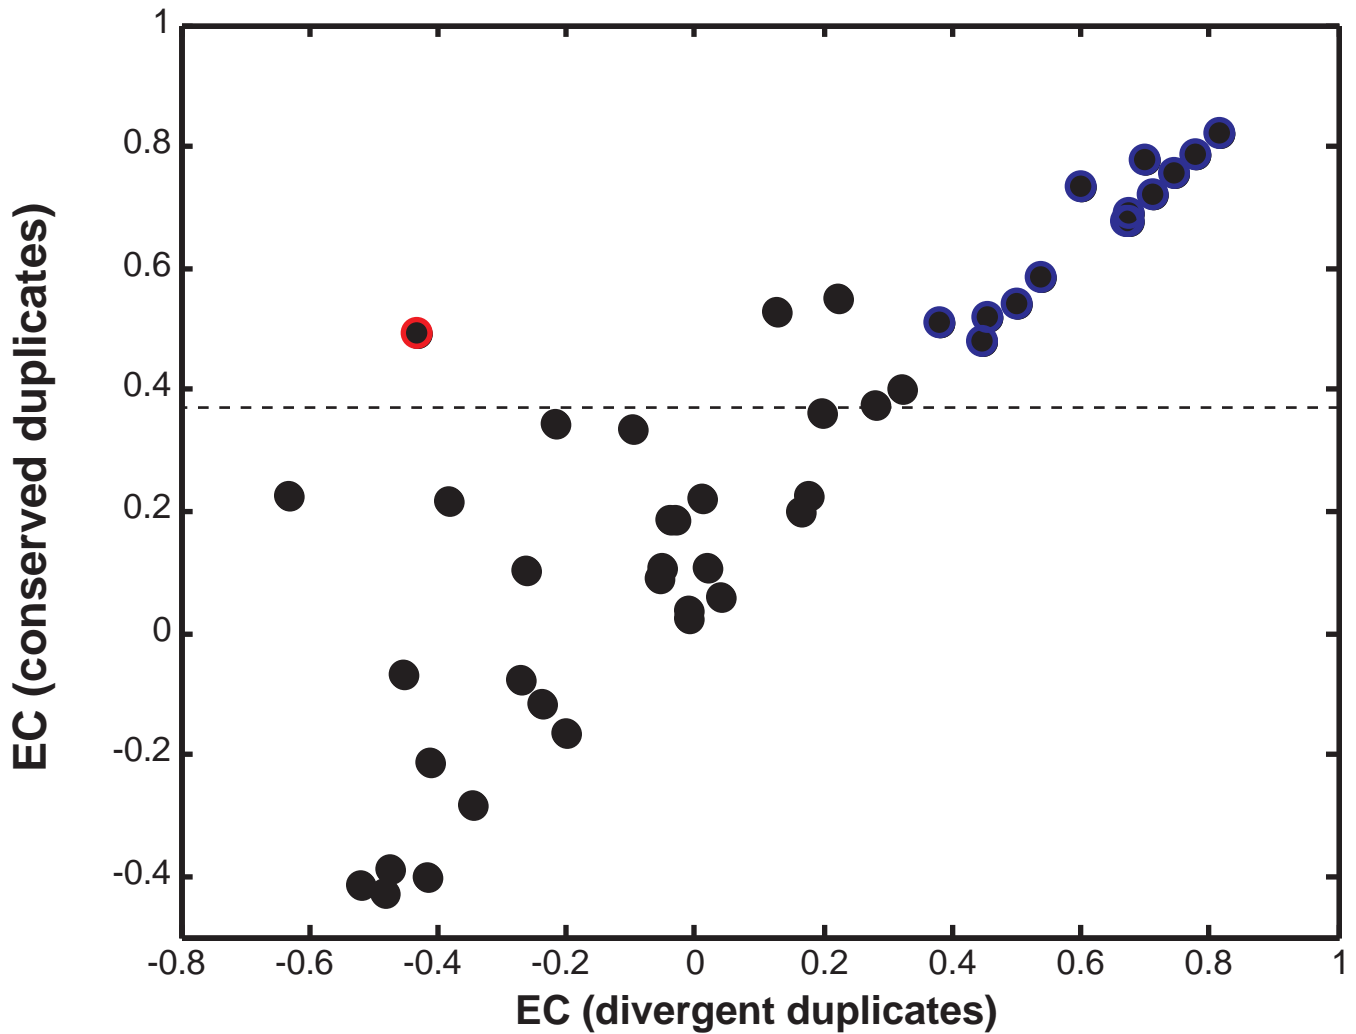

**Additional data file 3. Expression Conservation between duplicate pairs from small-scale duplication events and their single *C.albicans* orthologs.** Expression conservation was calculated for each of the 46 small-scale duplication pairs with their *C. albicans* single orthologs. Expression conservation of the more conserved copies are shown at the y-axis and those of the more divergent copies are shown at the x-axis. Dashed line represent the 0.05 significance threshold of  $EC > 0.37$ ; blue and red circles represent duplicate pairs with conserved expression and asymmetric divergence, respectively.
